# Supplementary material
Source: PubMed Central journal article supplement (PMC9594995)
Supplement: NIHMS1831213-supplement-bfac8621supp1_pdf.pdf [file NIHMS1831213-supplement-bfac8621supp1_pdf.pdf]

# Hybrid extracellular vesicles-liposome incorporated advanced bioink to deliver microRNA

## Supporting Information

### Graphical Abstract

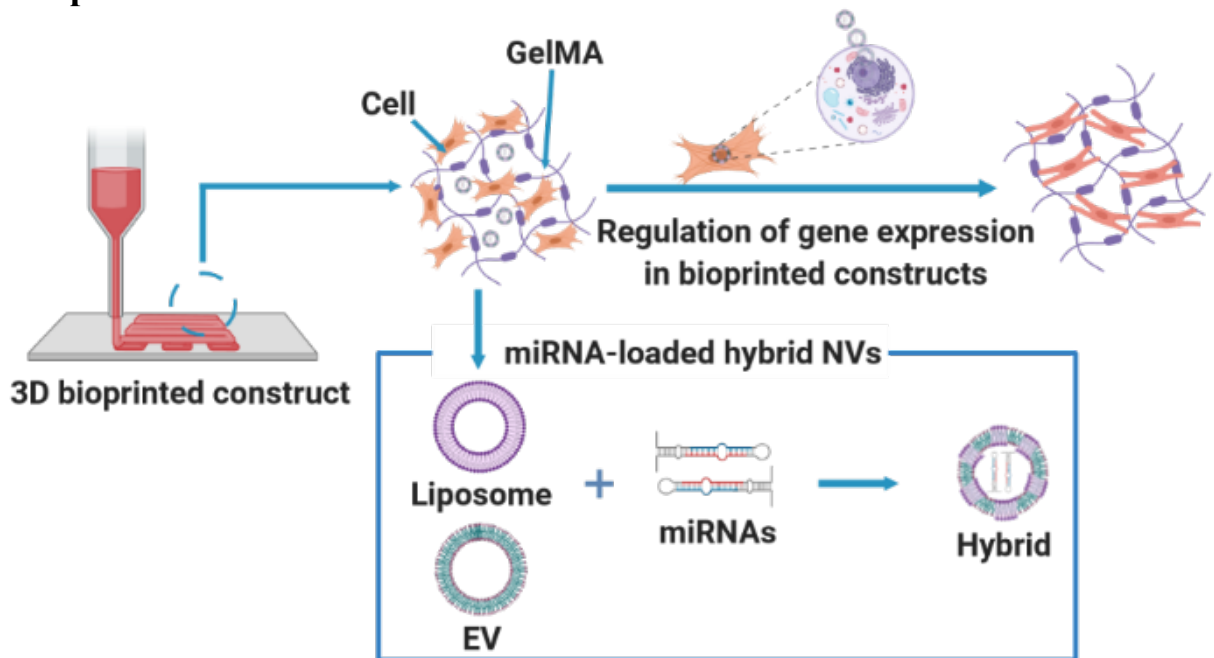

To regulate gene expression in 3D bioprinted constructs, hybrid extracellular vesicles-liposomes nanovesicles encapsulating microRNAs are embedded in gelatin-based bioinks. The targeting hybrid nanovesicles improved the native bioink's mechanical properties, biological functions, and printing ability without hampering its desirable biodegradability and biocompatibility. This unique bioink is a great candidate for bioprinting tissue grafts to treat injuries or diseases.

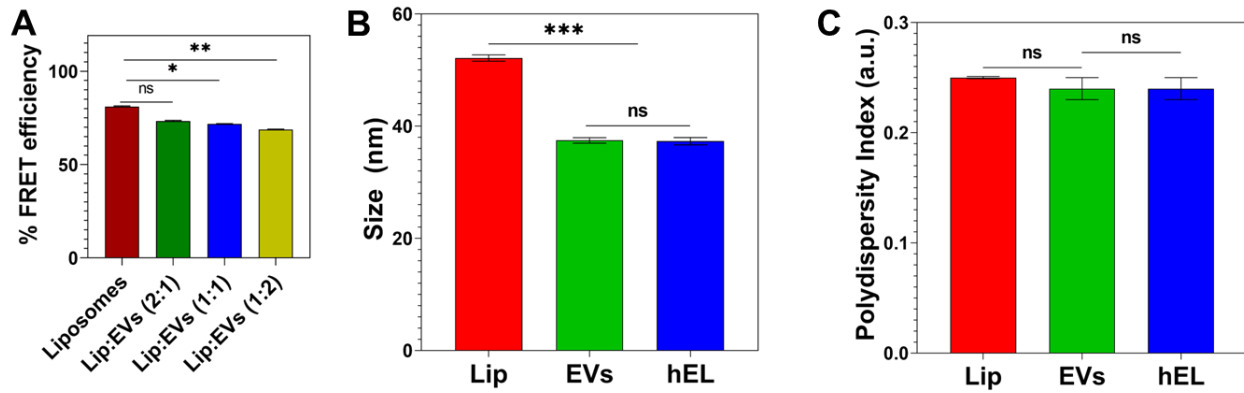

**Figure S1.** (A) The quantification of percentage FRET efficiency of different ratios of liposomes (Lip) to extracellular vesicles (EVs) (n=3). (B) Average size of NVs (n=3). (C) Average polydispersity index (PdI) of NVs (n=3). All data are expressed as mean  $\pm$  standard deviation. Significance is indicated as \*(p < 0.05), \*\*(p < 0.01) and \*\*\*(p < 0.001).

# CD 63-FITC

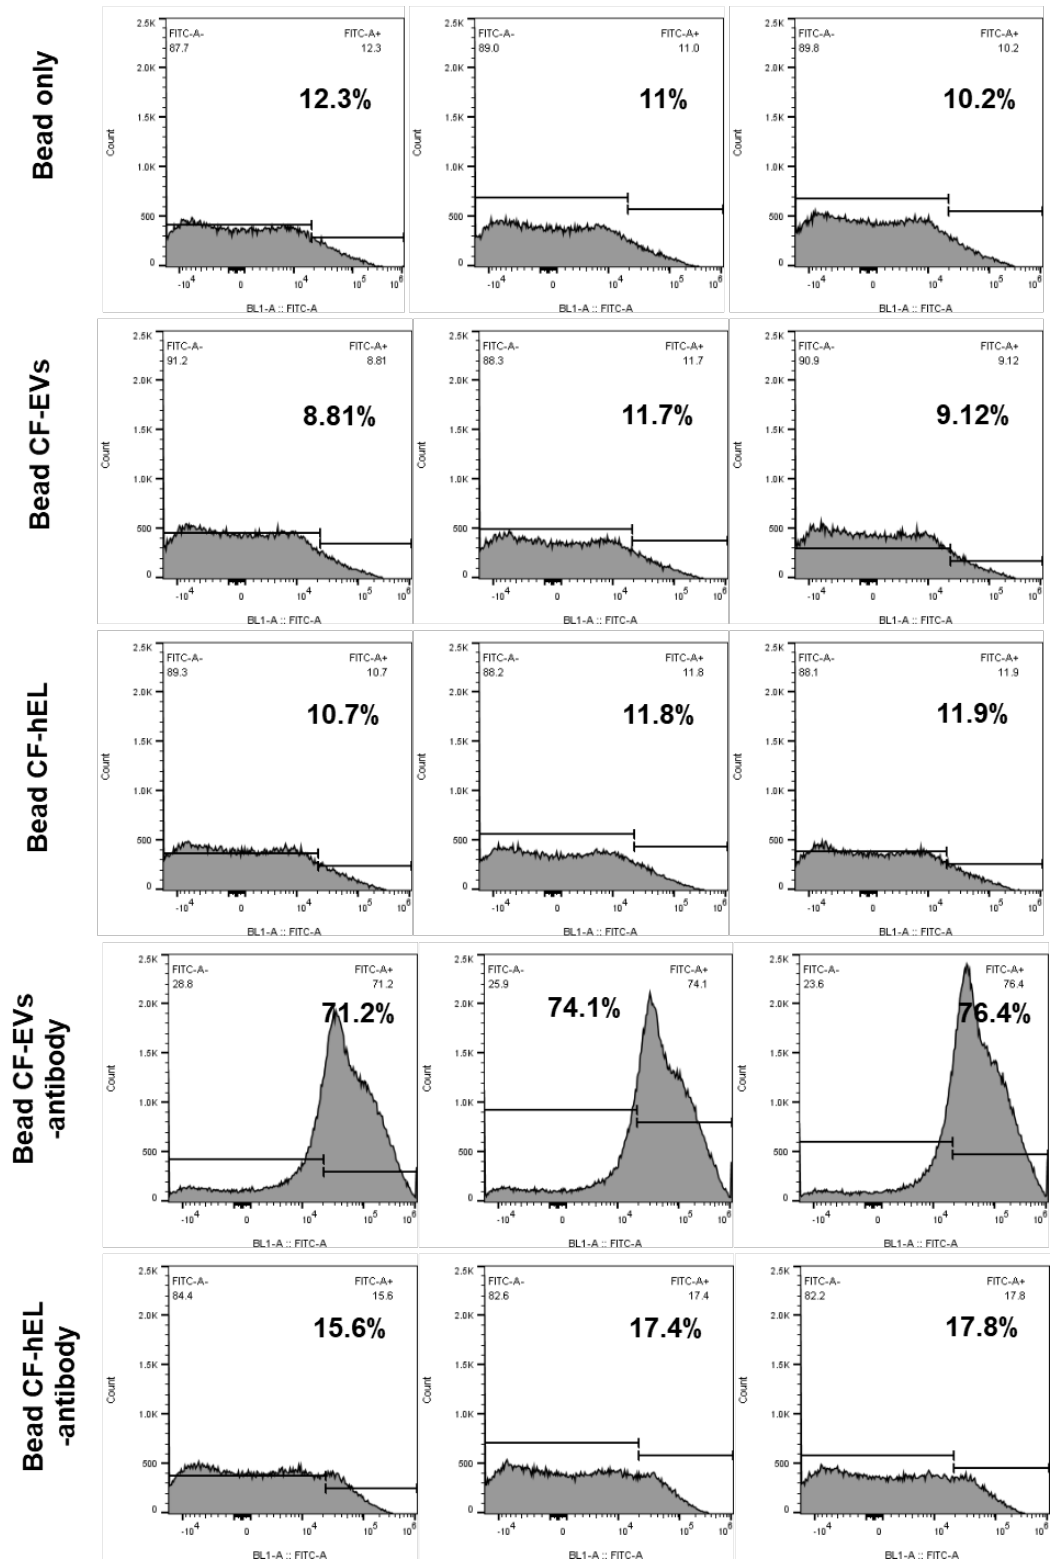

## CD 9-PE

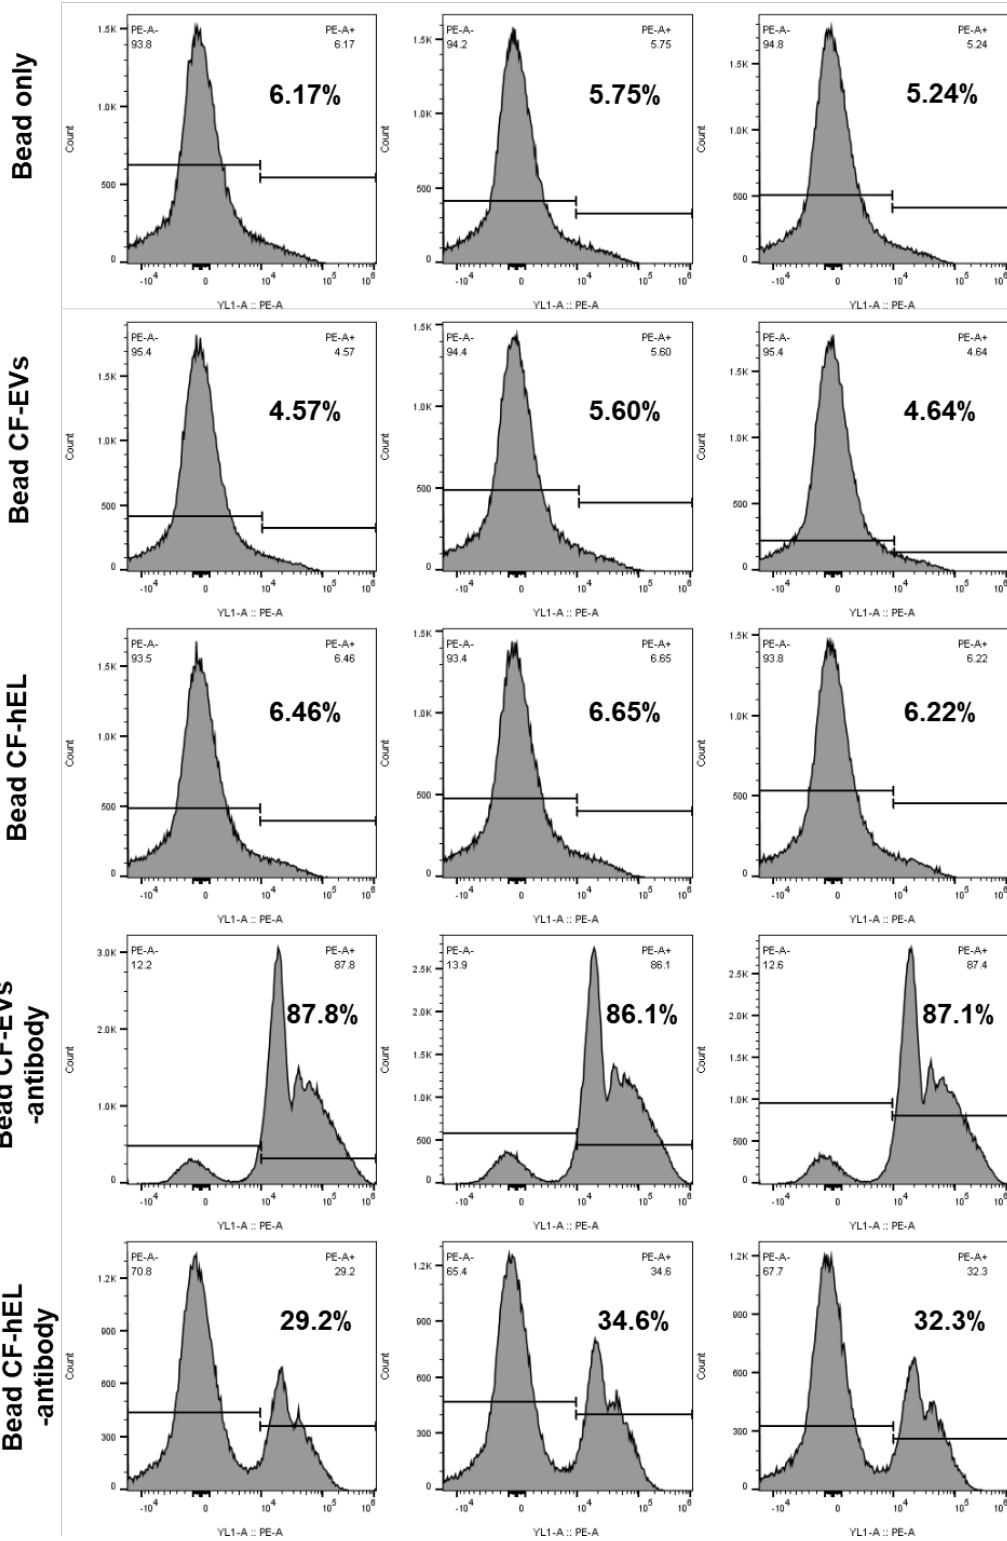

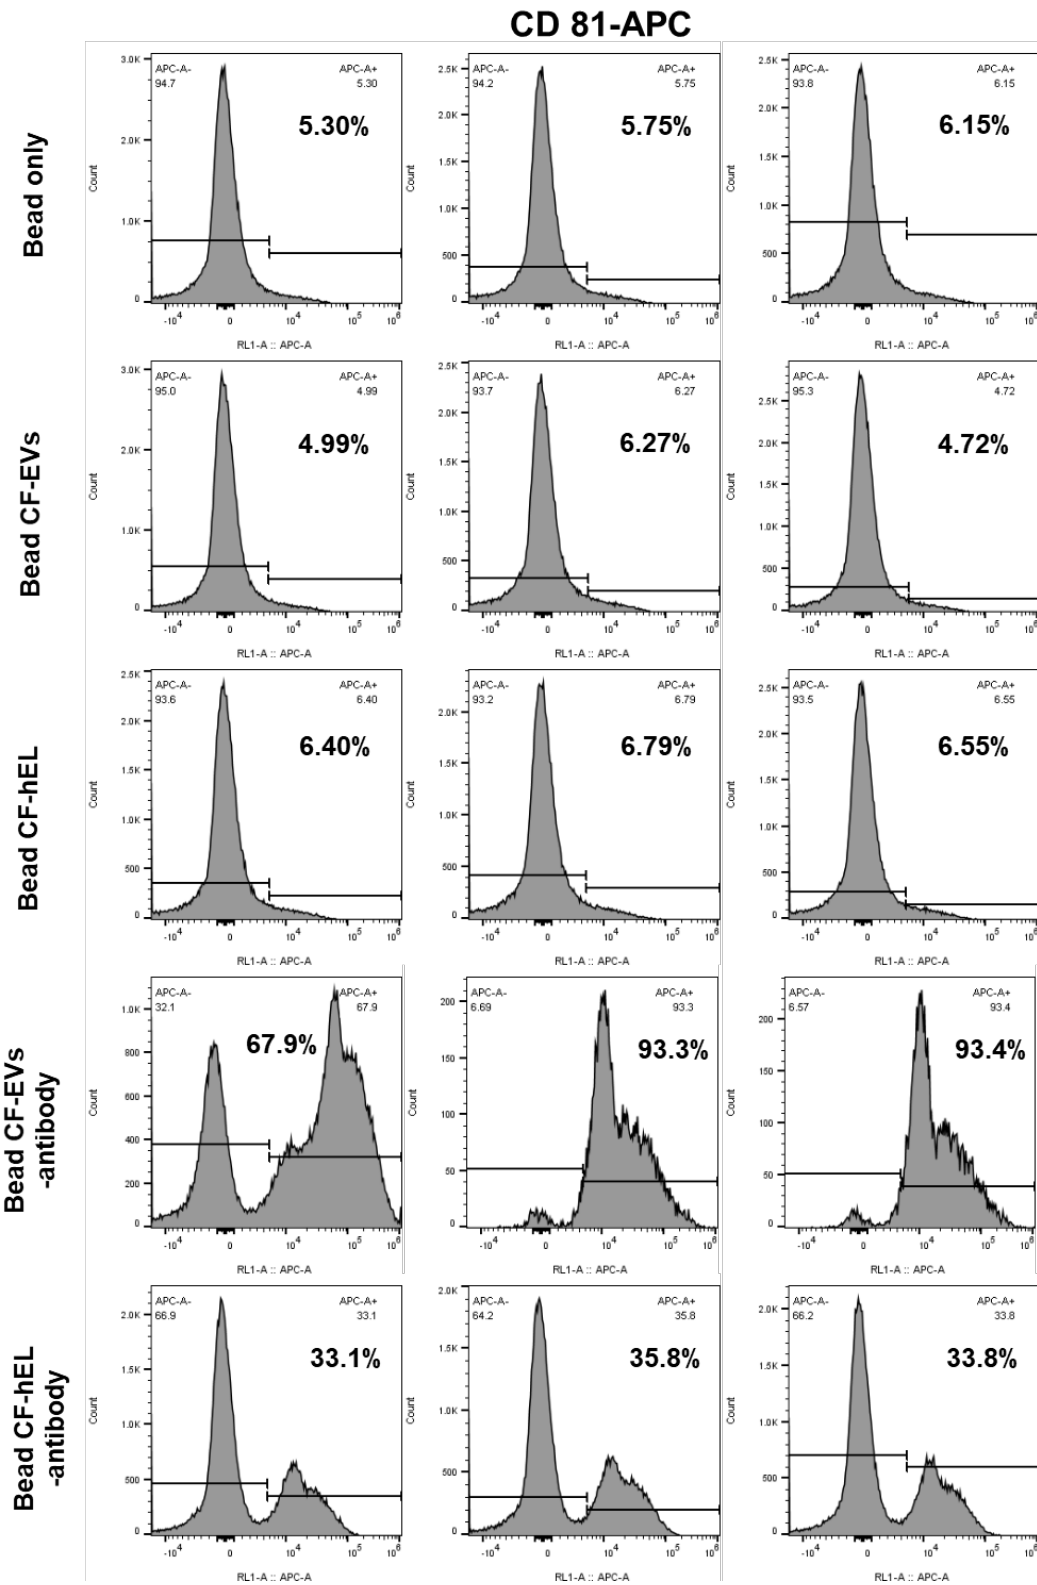

**Figure S2.** FACS analysis of markers CD9, CD63, and CD81 on EVs and hELs.

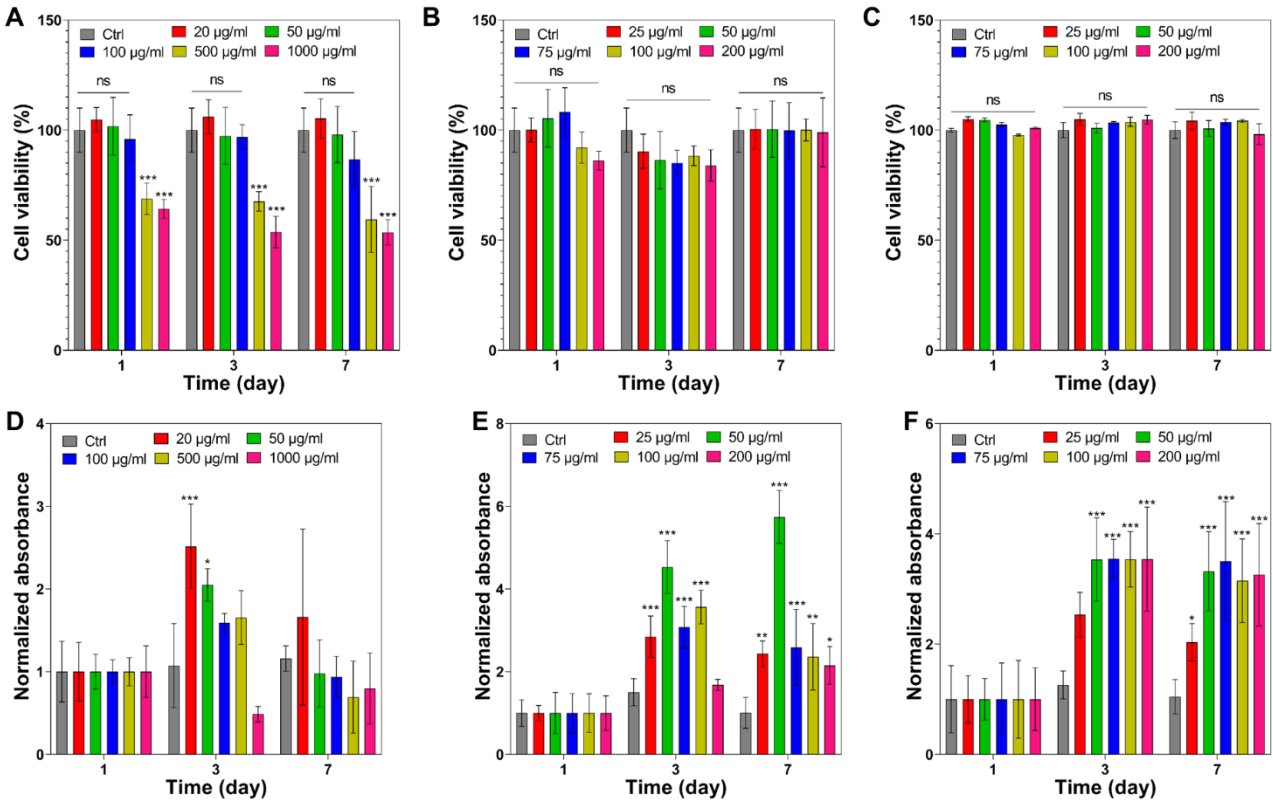

**Figure S3.** (A-C) Quantified viability of CFs cultured with different concentrations of (A) Lip, (B) EVs, and (C) hybrid NVs for 7 days (n=3). (D-F) PrestoBlue results showing the cell proliferation of CFs with different concentrations of (D) Lip, (E) EVs, and (F) hybrid NVs for 7 days (n=3). All data are expressed as mean  $\pm$  standard deviation. Significance is indicated as \*(p < 0.05), \*\*(p < 0.01) and \*\*\*(p < 0.001).

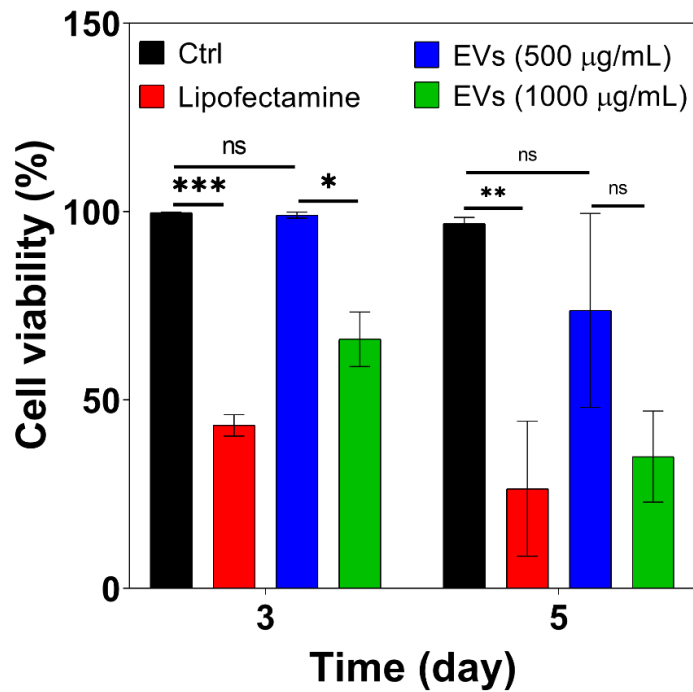

**Figure S4.** Quantified viability of CFs cultured with high concentrations of EVs and lipofectamine (n=3). All data are expressed as mean  $\pm$  standard deviation relative to the control. Significance is indicated as \*(p < 0.05), \*\*(p < 0.01) and \*\*\*(p < 0.001).

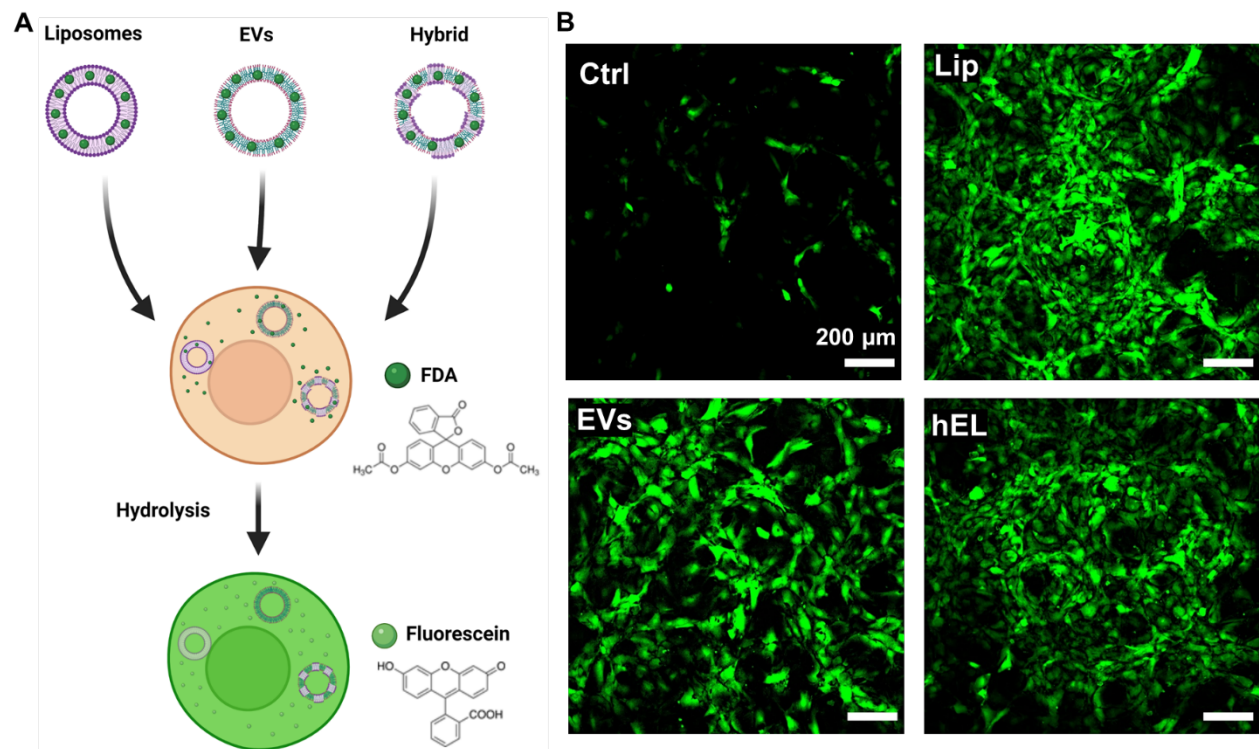

**Figure S5.** (A) Schematic representation of FDA-delivery *via* NVs. Created with BioRender.com. (B) Fluorescence images of FDA-loaded NVs uptake by CFs following incubation for 20 minutes.

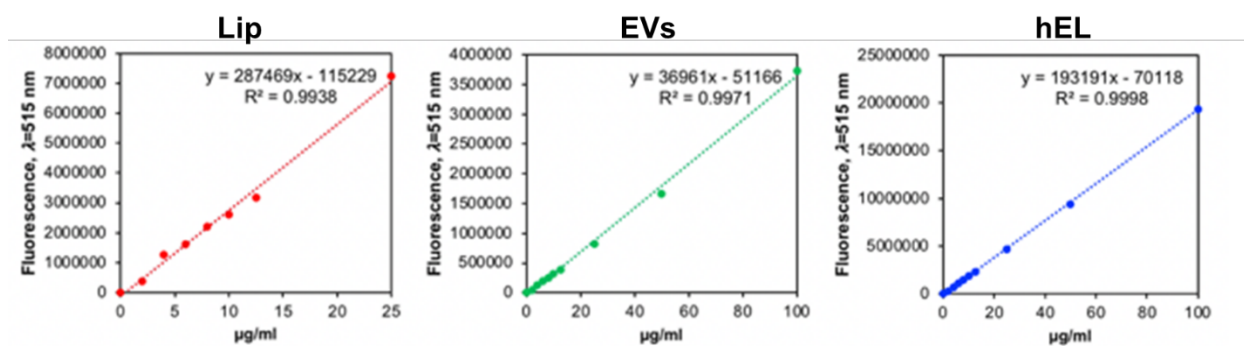

**Figure S6.** Standard curves of PKH67-labeled NVs with various concentrations. The fluorescence intensity of PKH67-labeled NVs was measured at  $\lambda = 515$  nm.

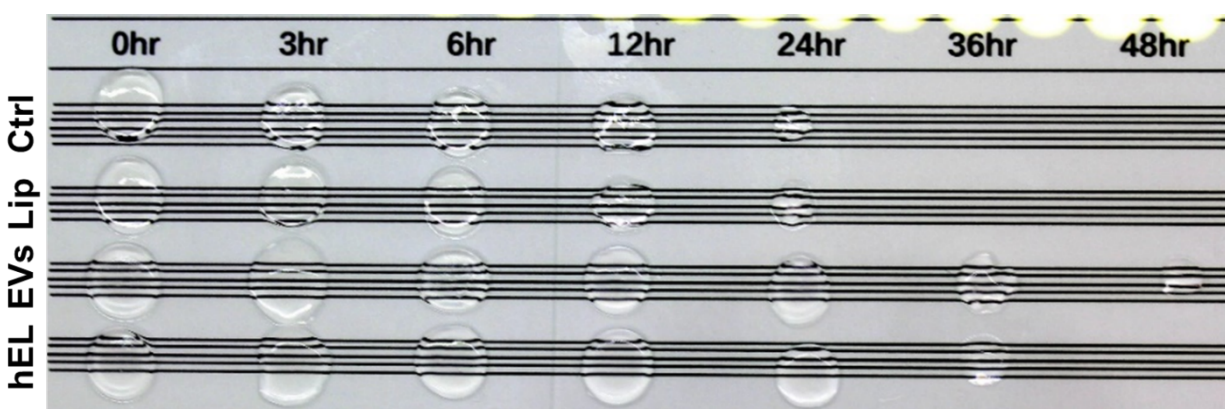

**Figure S7.** Images of 7.5% (w/v) Gel-NVs hydrogels degradation test performed in solutions of 0.1 U/mL of collagenase Type II inside an incubator operating at 37 °C for 0, 3, 6, 12, 24, 36, and 48 hours.
